# Supplementary material
Source: PubMed Central journal article supplement (PMC8274188)

## Supplemental Figure 2

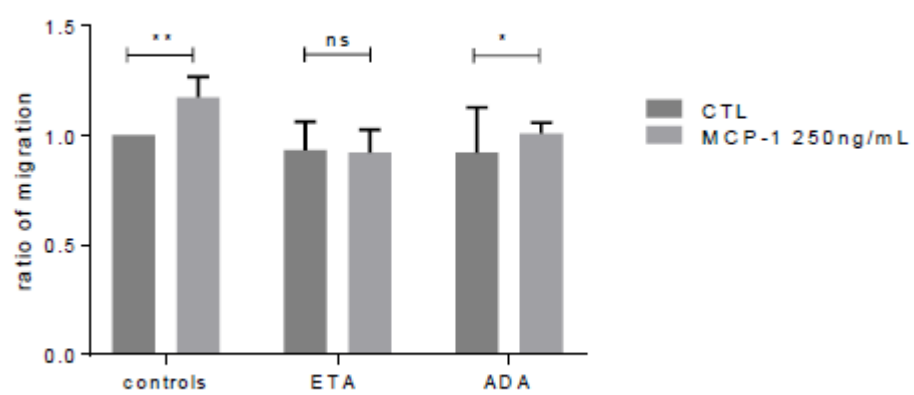

Supplement: CEI-205-169-s001.pdf [file CEI-205-169-s001.pdf]

# Supplemental Figure 1

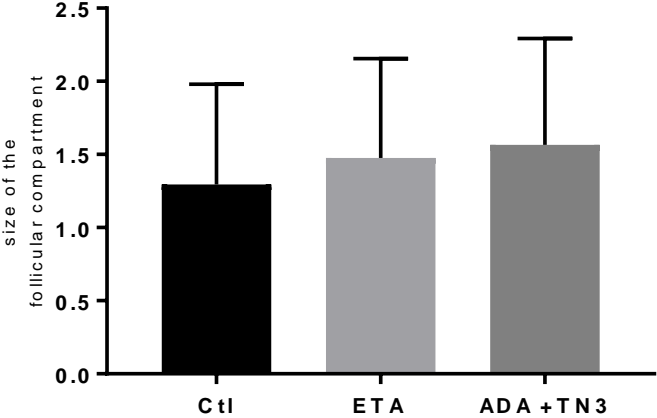

Supplement: CEI-205-169-s003.pdf [file CEI-205-169-s003.pdf]

# Supplemental Figure 3

A

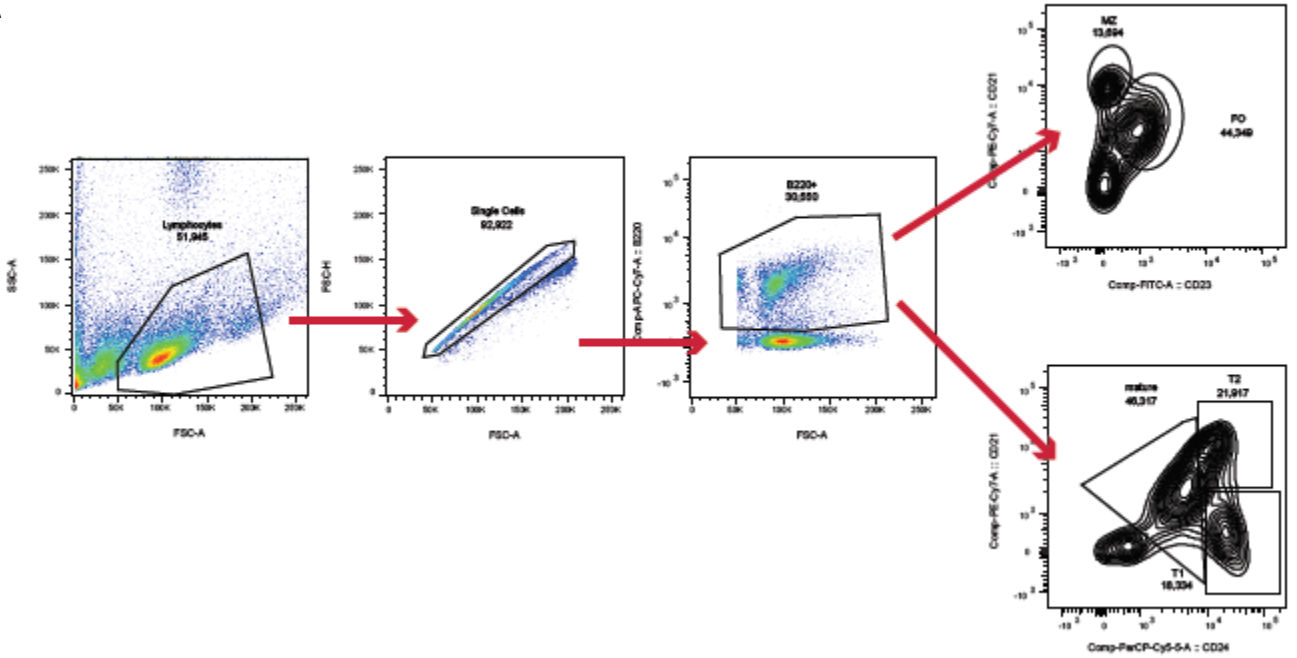

B

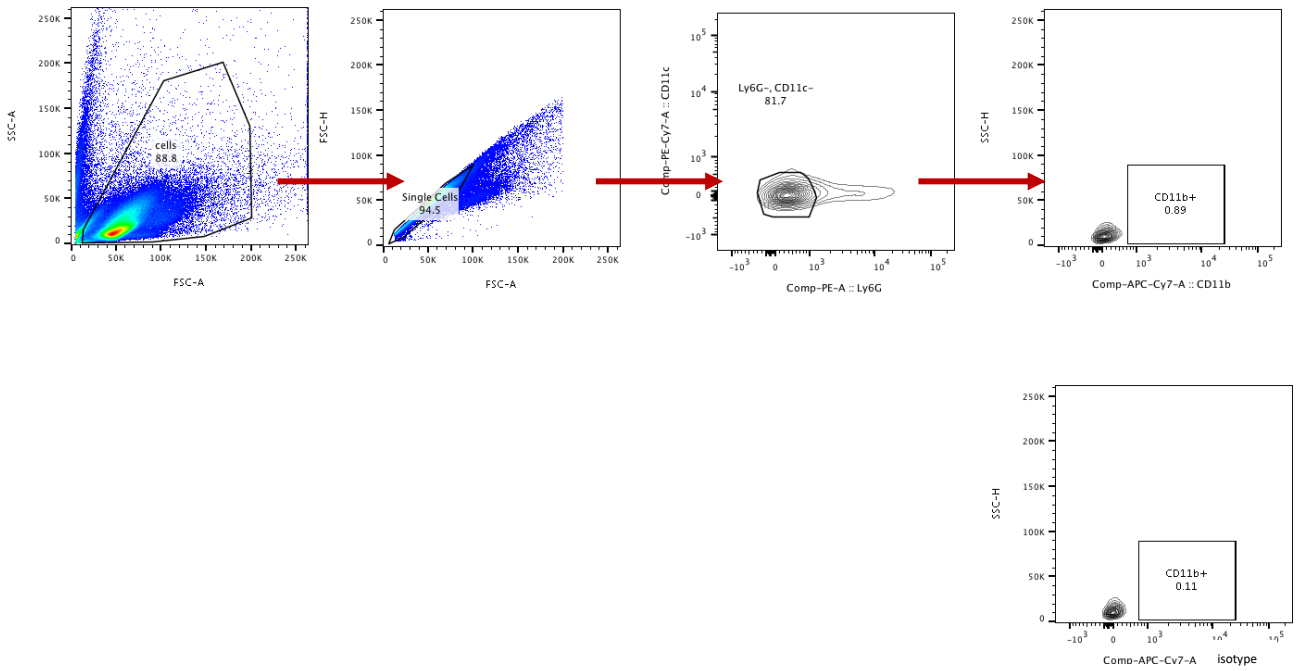

Supplement: CEI-205-169-s004.pdf [file CEI-205-169-s004.pdf]
